# Supplementary material for: Pre-Pregnancy Maternal Exposure to Persistent Organic Pollutants and Gestational Weight Gain: A Prospective Cohort Study
Source: PubMed Central journal article supplement (PMC5036738; doi:10.3390/ijerph13090905), 2016-09-12
Supplement: ijerph-13-00905-s001.pdf [file ijerph-13-00905-s001.pdf]

# Supplementary Materials: Pre-Pregnancy Maternal Exposure to Persistent Organic Pollutants and Gestational Weight Gain: A Prospective Cohort Study

Lindsay M. Jaacks, Dana Boyd Barr, Rajeshwari Sundaram, Jagteshwar Grewal, Cuilin Zhang and Germaine M. Buck Louis

## 1. Table S1

**Table S1.** Descriptive statistics of pre-pregnancy maternal levels of persistent organic pollutants (ng/mL).

| Chemical or Congener                  | % < LOD <sup>a</sup> | Mean (SD)       |
|---------------------------------------|----------------------|-----------------|
| Polybrominated biphenyl (PBB)         |                      |                 |
| PBB 153                               | 8.7                  | 0.0151 (0.0293) |
| Polybrominated diphenyl ethers (PBDE) |                      |                 |
| PBDE 17                               | 83.0                 | 0.0014 (0.0036) |
| PBDE 28                               | 24.3                 | 0.0123 (0.0180) |
| PBDE 47                               | 0.9                  | 0.2156 (0.3036) |
| PBDE 66                               | 87.2                 | 0.0012 (0.0025) |
| PBDE 85                               | 59.6                 | 0.0043 (0.0080) |
| PBDE 99                               | 24.3                 | 0.0432 (0.0869) |
| PBDE 100                              | 1.4                  | 0.0515 (0.0891) |
| PBDE 153                              | 0.5                  | 0.1023 (0.2094) |
| PBDE 154                              | 59.2                 | 0.0042 (0.0077) |
| PBDE 183                              | 84.4                 | 0.0018 (0.0022) |
| Polychlorinated biphenyls (PCB)       |                      |                 |
| PCB 28                                | 67.4                 | 0.0314 (0.3611) |
| PCB 44                                | 87.6                 | 0.0025 (0.0179) |
| PCB 49                                | 95.4                 | 0.0009 (0.0065) |
| PCB 52                                | 96.3                 | 0.0022 (0.0175) |
| PCB 66                                | 43.1                 | 0.0066 (0.0436) |
| PCB 74                                | 0                    | 0.0182 (0.0357) |
| PCB 87                                | 92.7                 | 0.0007 (0.0013) |
| PCB 99                                | 1.8                  | 0.0125 (0.0096) |
| PCB 101                               | 75.7                 | 0.0022 (0.0035) |
| PCB 105                               | 29.8                 | 0.0044 (0.0037) |
| PCB 110                               | 89.5                 | 0.0013 (0.0020) |
| PCB 114                               | 90.4                 | 0.0009 (0.0014) |
| PCB 118                               | 0.5                  | 0.0203 (0.0148) |
| PCB 128                               | 97.3                 | 0.0001 (0.0006) |
| PCB 138                               | 1.4                  | 0.0379 (0.0275) |
| PCB 146                               | 17.4                 | 0.0058 (0.0050) |
| PCB 149                               | 96.8                 | 0.0004 (0.0010) |
| PCB 151                               | 98.6                 | 0.0003 (0.0014) |
| PCB 153                               | 0                    | 0.0534 (0.0370) |
| PCB 156                               | 11.5                 | 0.0072 (0.0060) |
| PCB 157                               | 78.4                 | 0.0015 (0.0018) |
| PCB 167                               | 78.9                 | 0.0011 (0.0020) |
| PCB 170                               | 2.3                  | 0.0150 (0.0101) |
| PCB 172                               | 79.8                 | 0.0013 (0.0017) |

|                                                     |      |                   |
|-----------------------------------------------------|------|-------------------|
| PCB 177                                             | 60.6 | 0.0025 (0.0027)   |
| PCB 178                                             | 63.3 | 0.0022 (0.0026)   |
| PCB 180                                             | 0    | 0.0379 (0.0247)   |
| PCB 183                                             | 31.7 | 0.0043 (0.0040)   |
| PCB 187                                             | 6.4  | 0.0123 (0.0100)   |
| PCB 189                                             | 98.6 | 0.0004 (0.0007)   |
| PCB 194                                             | 13.3 | 0.0079 (0.0060)   |
| PCB 195                                             | 75.2 | 0.0014 (0.0018)   |
| PCB 196                                             | 9.2  | 0.0083 (0.0060)   |
| PCB 201                                             | 15.6 | 0.0077 (0.0062)   |
| PCB 206                                             | 30.3 | 0.0041 (0.0033)   |
| PCB 209                                             | 81.2 | 0.0019 (0.0014)   |
| <b>Organochlorine pesticides</b>                    |      |                   |
| HCB                                                 | 1.4  | 0.0503 (0.0228)   |
| β-HCH                                               | 59.6 | 0.0241 (0.1230)   |
| γ-HCH                                               | 99.5 | 0.0006 (0.0019)   |
| Oxychlorane                                         | 15.6 | 0.0360 (0.0297)   |
| Trans-nonachlor                                     | 3.2  | 0.0662 (0.0657)   |
| p,p'-DDT                                            | 59.6 | 0.0158 (0.0270)   |
| o,p'-DDT                                            | 99.5 | 0.0015 (0.0029)   |
| p,p'-DDE                                            | 0    | 0.7925 (1.1370)   |
| Mirex                                               | 80.7 | 0.0117 (0.0243)   |
| <b>Perfluoroalkyls and polyfluoroalkyls (PFAAs)</b> |      |                   |
| Et-PFOA-AcOH                                        | 99.5 | 0.0317 (0.0564)   |
| Me-PFOA-AcOH                                        | 44.5 | 0.4276 (0.4478)   |
| PFDeA                                               | 23.9 | 0.4727 (0.4117)   |
| PFNA                                                | 2.3  | 1.3540 (0.7510)   |
| PFOSA                                               | 89.5 | 0.0120 (0.0366)   |
| PFOS                                                | 0    | 14.8120 (11.2803) |
| PFOA                                                | 0.5  | 3.6580 (1.9728)   |

LOD: limit of detection; SD: standard deviation; <sup>a</sup> The mean LOD across all samples ( $n = 218$ ) for PBB 153 was 0.0026 ng/mL; for PBDE 47 was 0.0114 ng/mL; for PBDE 99 was 0.0101 ng/mL; for all other PBDE congeners was 0.0026 ng/mL; for PCB 28 was 0.0083 ng/mL; for PCB 52 was 0.0040 ng/mL; for all other PCB congeners was 0.0025 ng/mL; for all organochlorine pesticides was 0.0128 ng/mL; for PFNA, PFOSA, and PFOA was 0.1 ng/mL; and for all other PFAAs was 0.2 ng/mL.

## 2. Table S2

**Table S2.** Correlations between pre-pregnancy persistent organic pollutant levels and maternal age, body mass index (BMI), and serum lipids.

| Chemical or Congener                         | Age         | BMI           | Serum Lipids |
|----------------------------------------------|-------------|---------------|--------------|
| <b>Polybrominated biphenyl (PBB)</b>         |             |               |              |
| PBB 153                                      | 0.10 (0.14) | 0.02 (0.80)   | 0.00 (0.98)  |
| <b>Polybrominated diphenyl ethers (PBDE)</b> |             |               |              |
| PBDE 17                                      | 0.13 (0.07) | 0.03 (0.66)   | 0.05 (0.50)  |
| PBDE 28                                      | 0.07 (0.32) | 0.03 (0.66)   | 0.22 (0.001) |
| PBDE 47                                      | 0.05 (0.47) | 0.16 (0.02)   | 0.19 (0.005) |
| PBDE 66                                      | 0.06 (0.38) | 0.14 (0.04)   | 0.01 (0.86)  |
| PBDE 85                                      | 0.09 (0.19) | 0.18 (0.009)  | 0.10 (0.14)  |
| PBDE 99                                      | 0.10 (0.14) | 0.24 (0.0005) | 0.14 (0.05)  |
| PBDE 100                                     | 0.06 (0.36) | 0.10 (0.14)   | 0.12 (0.08)  |
| PBDE 153                                     | 0.06 (0.41) | -0.08 (0.23)  | 0.06 (0.39)  |

|                                                     |                |              |                |
|-----------------------------------------------------|----------------|--------------|----------------|
| PBDE 154                                            | 0.08 (0.27)    | 0.20 (0.005) | 0.12 (0.09)    |
| PBDE 183                                            | 0.04 (0.58)    | −0.01 (0.94) | 0.14 (0.04)    |
| <b>Polychlorinated biphenyls (PCB)</b>              |                |              |                |
| PCB 28                                              | −0.03 (0.69)   | 0.07 (0.27)  | −0.04 (0.53)   |
| PCB 44                                              | −0.03 (0.69)   | 0.07 (0.29)  | −0.06 (0.42)   |
| PCB 49                                              | −0.03 (0.63)   | 0.06 (0.37)  | −0.04 (0.56)   |
| PCB 52                                              | −0.03 (0.65)   | 0.07 (0.31)  | −0.05 (0.47)   |
| PCB 66                                              | −0.02 (0.77)   | 0.08 (0.26)  | −0.03 (0.69)   |
| PCB 74                                              | 0.06 (0.36)    | 0.08 (0.27)  | 0.04 (0.52)    |
| PCB 87                                              | 0.05 (0.47)    | 0.09 (0.17)  | 0.11 (0.13)    |
| PCB 99                                              | 0.22 (0.001)   | 0.06 (0.36)  | 0.27 (0.0002)  |
| PCB 101                                             | 0.02 (0.75)    | 0.08 (0.21)  | 0.03 (0.63)    |
| PCB 105                                             | 0.20 (0.003)   | 0.11 (0.11)  | 0.33 (<0.0001) |
| PCB 110                                             | 0.04 (0.57)    | 0.07 (0.27)  | 0.01 (0.87)    |
| PCB 114                                             | 0.16 (0.02)    | −0.01 (0.89) | 0.12 (0.10)    |
| PCB 118                                             | 0.25 (0.0002)  | 0.07 (0.29)  | 0.31 (<0.0001) |
| PCB 128                                             | 0.04 (0.51)    | 0.10 (0.13)  | 0.16 (0.02)    |
| PCB 138                                             | 0.30 (<0.0001) | 0.00 (0.98)  | 0.25 (0.0006)  |
| PCB 146                                             | 0.32 (<0.0001) | −0.04 (0.56) | 0.20 (0.005)   |
| PCB 149                                             | 0.17 (0.01)    | 0.09 (0.21)  | 0.09 (0.21)    |
| PCB 151                                             | 0.16 (0.02)    | 0.06 (0.41)  | 0.08 (0.27)    |
| PCB 153                                             | 0.33 (<0.0001) | −0.07 (0.33) | 0.22 (0.002)   |
| PCB 156                                             | 0.21 (0.002)   | −0.14 (0.03) | 0.09 (0.20)    |
| PCB 157                                             | 0.22 (0.001)   | −0.14 (0.04) | 0.05 (0.44)    |
| PCB 167                                             | 0.29 (<0.0001) | 0.04 (0.52)  | 0.18 (0.01)    |
| PCB 170                                             | 0.35 (<0.0001) | −0.10 (0.13) | 0.20 (0.004)   |
| PCB 172                                             | 0.33 (<0.0001) | 0.01 (0.84)  | 0.19 (0.007)   |
| PCB 177                                             | 0.33 (<0.0001) | 0.02 (0.81)  | 0.24 (0.0005)  |
| PCB 178                                             | 0.26 (0.0001)  | −0.06 (0.37) | 0.20 (0.005)   |
| PCB 180                                             | 0.37 (<0.0001) | −0.12 (0.07) | 0.18 (0.01)    |
| PCB 183                                             | 0.35 (<0.0001) | 0.07 (0.34)  | 0.27 (0.0002)  |
| PCB 187                                             | 0.32 (<0.0001) | −0.01 (0.85) | 0.23 (0.001)   |
| PCB 189                                             | 0.18 (0.007)   | −0.10 (0.16) | 0.06 (0.35)    |
| PCB 194                                             | 0.40 (<0.0001) | −0.11 (0.11) | 0.16 (0.02)    |
| PCB 195                                             | 0.28 (<0.0001) | −0.07 (0.29) | 0.18 (0.01)    |
| PCB 196                                             | 0.42 (<0.0001) | 0.00 (0.98)  | 0.21 (0.003)   |
| PCB 201                                             | 0.39 (<0.0001) | −0.06 (0.35) | 0.15 (0.04)    |
| PCB 206                                             | 0.41 (<0.0001) | −0.02 (0.79) | 0.19 (0.008)   |
| PCB 209                                             | 0.45 (<0.0001) | −0.11 (0.12) | 0.18 (0.009)   |
| <b>Organochlorine pesticides</b>                    |                |              |                |
| HCB                                                 | 0.16 (0.02)    | 0.02 (0.72)  | 0.44 (<0.0001) |
| β-HCH                                               | 0.12 (0.09)    | −0.03 (0.70) | 0.15 (0.03)    |
| γ-HCH                                               | 0.03 (0.69)    | 0.00 (0.95)  | −0.07 (0.34)   |
| Oxychlorodane                                       | 0.19 (0.004)   | 0.05 (0.43)  | 0.31 (<0.0001) |
| Trans-nonachlor                                     | 0.17 (0.01)    | 0.07 (0.27)  | 0.28 (<0.0001) |
| p,p'-DDT                                            | 0.13 (0.06)    | 0.00 (0.99)  | 0.15 (0.03)    |
| o,p'-DDT                                            | 0.16 (0.02)    | 0.00 (1.00)  | 0.17 (0.01)    |
| p,p'-DDE                                            | 0.28 (<0.0001) | −0.07 (0.33) | 0.28 (<0.0001) |
| Mirex                                               | 0.15 (0.02)    | 0.01 (0.92)  | 0.06 (0.36)    |
| <b>Perfluoroalkyls and polyfluoroalkyls (PFAAs)</b> |                |              |                |
| Et-PFOSA-AcOH                                       | 0.17 (0.02)    | −0.05 (0.46) | −0.06 (0.40)   |
| Me-PFOSA-AcOH                                       | 0.00 (0.99)    | −0.06 (0.39) | −0.06 (0.41)   |

|       |              |              |              |
|-------|--------------|--------------|--------------|
| PFDeA | 0.14 (0.04)  | -0.02 (0.74) | 0.08 (0.27)  |
| PFNA  | 0.10 (0.15)  | 0.02 (0.80)  | 0.12 (0.07)  |
| PFOSA | -0.02 (0.77) | -0.04 (0.58) | -0.02 (0.72) |
| PFOS  | 0.10 (0.13)  | -0.04 (0.56) | 0.08 (0.26)  |
| PFOA  | -0.04 (0.58) | -0.04 (0.60) | 0.12 (0.08)  |

Correlation coefficients from the multiple imputations were combined using Fisher's z transformation. Serum lipids were estimated from the Phillips 1989 equation and re-scaled and natural-log transformed. Values are Pearson correlation coefficients (*p*-value). *p*-values < 0.05 are bolded. Average limit of detection (LOD) across all participants (each sample has its own LOD).

### 3. Table S3

**Table S3.** Estimates from linear regression of the association between persistent organic pollutants and gestational weight gain stratified by pre-pregnancy body mass index (BMI) status <sup>a</sup>.

| Chemical or Congener                  | Total GWG                                      |                                                | AUC                                            |                                                |
|---------------------------------------|------------------------------------------------|------------------------------------------------|------------------------------------------------|------------------------------------------------|
|                                       | BMI < 25 kg/m <sup>2</sup><br>Beta<br>(95% CI) | BMI ≥ 25 kg/m <sup>2</sup><br>Beta<br>(95% CI) | BMI < 25 kg/m <sup>2</sup><br>Beta<br>(95% CI) | BMI ≥ 25 kg/m <sup>2</sup><br>Beta<br>(95% CI) |
| Polybrominated biphenyl (PBB)         |                                                |                                                |                                                |                                                |
| PBB 153                               | -0.42<br>(-1.27, 0.43)                         | -1.31<br>(-3.48, 0.87)                         | -175.29<br>(-421.41, 70.82)                    | -239.82<br>(-716.47, 236.82)                   |
| Polybrominated diphenyl ethers (PBDE) |                                                |                                                |                                                |                                                |
| PBDE 17                               | -0.34<br>(-1.09, 0.41)                         | 0.73<br>(-1.55, 3.01)                          | -126.74<br>(-344.60, 91.12)                    | 127.81<br>(-360.84, 616.46)                    |
| PBDE 28                               | -0.20<br>(-1.06, 0.65)                         | 0.09<br>(-2.59, 2.78)                          | -65.53<br>(-315.00, 183.94)                    | -476.64<br>(-1068.50, 115.23)                  |
| PBDE 47                               | -0.02<br>(-1.09, 1.04)                         | 0.99<br>(-0.78, 2.76)                          | -25.23<br>(-334.83, 284.36)                    | -296.37<br>(-722.17, 129.43)                   |
| PBDE 66                               | -0.16<br>(-1.08, 0.76)                         | -1.21<br>(-2.89, 0.48)                         | -31.72<br>(-298.28, 234.83)                    | -376.04<br>(-734.05, -18.03)                   |
| PBDE 85                               | 0.01<br>(-1.17, 1.19)                          | 1.47<br>(-0.40, 3.34)                          | 46.38<br>(-296.84, 389.60)                     | -236.86<br>(-708.60, 234.88)                   |
| PBDE 99                               | 0.25<br>(-0.97, 1.47)                          | 1.48<br>(-0.19, 3.14)                          | 29.85<br>(-325.45, 385.14)                     | -164.69<br>(-593.44, 264.07)                   |
| PBDE 100                              | 0.01<br>(-0.89, 0.92)                          | 0.34<br>(-1.55, 2.23)                          | 143.59<br>(-119.12, 406.30)                    | -357.41<br>(-775.26, 60.43)                    |
| PBDE 153                              | 0.01<br>(-0.77, 0.78)                          | 0.24<br>(-1.81, 2.28)                          | 194.07<br>(-28.63, 416.77)                     | -142.36<br>(-586.73, 302.00)                   |
| PBDE 154                              | -0.18<br>(-1.30, 0.93)                         | 1.35<br>(-0.39, 3.10)                          | 40.23<br>(-282.86, 363.32)                     | -328.21<br>(-808.91, 152.50)                   |
| PBDE 183                              | -0.43<br>(-1.23, 0.38)                         | -0.10<br>(-2.02, 1.83)                         | -127.55<br>(-361.09, 105.98)                   | 18.29<br>(-399.15, 435.74)                     |
| Polychlorinated biphenyls (PCB)       |                                                |                                                |                                                |                                                |
| PCB 28                                | 4.36<br>(-14.91, 23.62)                        | -0.42<br>(-1.47, 0.63)                         | 4044.90<br>(-1506.73, 9596.53)                 | -38.28<br>(-268.70, 192.14)                    |
| PCB 44                                | 0.43<br>(-10.17, 11.04)                        | -0.37<br>(-1.43, 0.69)                         | 112.69<br>(-2740.38, 2965.77)                  | -24.45<br>(-256.77, 207.87)                    |
| PCB 49                                | 4.16<br>(-4.01, 12.34)                         | -0.41<br>(-1.47, 0.65)                         | 1187.15<br>(-1125.50, 3499.80)                 | -37.66<br>(-269.72, 194.40)                    |
| PCB 52                                | 8.77<br>(-0.85, 18.38)                         | -0.40<br>(-1.46, 0.65)                         | 2029.51<br>(-853.53, 4912.55)                  | -32.67<br>(-263.92, 198.58)                    |
| PCB 66                                | 7.87<br>(-1.82, 17.57)                         | -0.45<br>(-1.50, 0.61)                         | 3097.98<br>(315.94, 5880.01)                   | -45.54<br>(-276.42, 185.33)                    |
| PCB 74                                | 0.18<br>(-3.06, 3.42)                          | -0.37<br>(-1.45, 0.72)                         | 225.98<br>(-712.50, 1164.46)                   | -36.59<br>(-273.42, 200.25)                    |

|         |                        |                         |                                |                               |
|---------|------------------------|-------------------------|--------------------------------|-------------------------------|
| PCB 87  | 1.24<br>(-0.11, 2.58)  | -0.44<br>(-1.75, 0.87)  | 351.21<br>(-52.25, 754.67)     | -66.98<br>(-353.40, 219.45)   |
| PCB 99  | 0.23<br>(-0.95, 1.40)  | -0.33<br>(-1.91, 1.24)  | 137.83<br>(-208.77, 484.43)    | -89.89<br>(-433.62, 253.83)   |
| PCB 101 | 2.15<br>(0.28, 4.03)   | -0.94<br>(-2.48, 0.61)  | 461.11<br>(-131.46, 1053.67)   | -118.18<br>(-456.41, 220.05)  |
| PCB 105 | 0.28<br>(-0.94, 1.50)  | -0.64<br>(-2.24, 0.95)  | 149.67<br>(-205.22, 504.57)    | -173.77<br>(-521.23, 173.68)  |
| PCB 110 | 0.25<br>(-0.81, 1.31)  | -0.83<br>(-2.32, 0.67)  | 21.67<br>(-296.87, 340.21)     | -107.30<br>(-436.43, 221.83)  |
| PCB 114 | 0.10<br>(-0.75, 0.95)  | 0.00<br>(-1.91, 1.92)   | 94.28<br>(-151.86, 340.42)     | -71.29<br>(-489.69, 347.12)   |
| PCB 118 | 0.31<br>(-0.93, 1.54)  | -0.39<br>(-1.99, 1.20)  | 194.62<br>(-162.72, 551.97)    | -119.64<br>(-466.63, 227.35)  |
| PCB 128 | 1.52<br>(-0.24, 3.29)  | -0.51<br>(-2.41, 1.39)  | 454.69<br>(-391.42, 1300.80)   | -223.47<br>(-635.66, 188.72)  |
| PCB 138 | -0.33<br>(-1.55, 0.89) | -0.11<br>(-1.87, 1.64)  | -15.46<br>(-369.65, 338.72)    | -24.20<br>(-407.37, 358.96)   |
| PCB 146 | -0.48<br>(-1.64, 0.69) | 0.13<br>(-1.69, 1.95)   | -35.67<br>(-377.51, 306.16)    | -8.68<br>(-405.56, 388.20)    |
| PCB 149 | 2.10<br>(-3.28, 7.47)  | -5.54<br>(-11.68, 0.59) | 993.13<br>(-888.84, 2875.09)   | -914.96<br>(-2264.67, 434.76) |
| PCB 151 | 8.70<br>(0.52, 16.87)  | -3.33<br>(-8.11, 1.45)  | 1619.97<br>(-2011.45, 5251.39) | -706.19<br>(-1750.69, 338.31) |
| PCB 153 | -0.39<br>(-1.58, 0.80) | 0.06<br>(-1.83, 1.94)   | -46.41<br>(-392.78, 299.96)    | 0.58<br>(-411.34, 412.50)     |
| PCB 156 | -0.18<br>(-1.06, 0.70) | 0.55<br>(-1.51, 2.62)   | -62.61<br>(-317.08, 191.85)    | 31.73<br>(-415.95, 479.40)    |
| PCB 157 | -0.01<br>(-0.86, 0.84) | 0.04<br>(-1.94, 2.01)   | -21.71<br>(-268.34, 224.91)    | 19.68<br>(-410.59, 449.94)    |
| PCB 167 | 0.84<br>(-0.25, 1.92)  | 0.18<br>(-1.47, 1.84)   | 311.93<br>(-1.24, 625.10)      | 6.03<br>(-355.79, 367.84)     |
| PCB 170 | -0.74<br>(-1.92, 0.44) | 0.71<br>(-1.40, 2.82)   | -197.72<br>(-541.26, 145.82)   | 147.75<br>(-310.78, 606.28)   |
| PCB 172 | -0.77<br>(-1.94, 0.40) | -0.11<br>(-1.92, 1.70)  | -138.99<br>(-482.32, 204.35)   | 4.08<br>(-390.22, 398.38)     |
| PCB 177 | -0.86<br>(-3.13, 1.42) | 0.19<br>(-2.56, 2.94)   | -44.87<br>(-709.65, 619.92)    | 151.30<br>(-448.95, 751.56)   |
| PCB 178 | -0.48<br>(-1.72, 0.77) | 0.51<br>(-1.53, 2.55)   | -53.54<br>(-416.56, 309.49)    | 278.55<br>(-164.27, 721.36)   |
| PCB 180 | -0.66<br>(-1.84, 0.52) | 0.81<br>(-1.21, 2.83)   | -144.46<br>(-488.14, 199.22)   | 199.61<br>(-238.32, 637.54)   |
| PCB 183 | -0.29<br>(-2.18, 1.60) | -0.43<br>(-2.75, 1.88)  | 189.95<br>(-358.13, 738.03)    | 12.43<br>(-492.95, 517.80)    |
| PCB 187 | -0.86<br>(-2.42, 0.70) | 0.22<br>(-1.92, 2.35)   | -151.53<br>(-604.66, 301.60)   | 80.35<br>(-386.20, 546.91)    |
| PCB 189 | -0.49<br>(-1.37, 0.39) | 0.22<br>(-1.61, 2.05)   | -112.59<br>(-368.96, 143.78)   | 127.18<br>(-270.70, 525.07)   |
| PCB 194 | -0.36<br>(-1.41, 0.68) | 1.33<br>(-0.49, 3.15)   | -61.03<br>(-366.58, 244.52)    | 306.69<br>(-91.50, 704.87)    |
| PCB 195 | -0.44<br>(-1.62, 0.74) | 0.55<br>(-1.26, 2.37)   | -74.38<br>(-417.39, 268.64)    | 287.24<br>(-103.54, 678.03)   |
| PCB 196 | -0.51<br>(-1.79, 0.76) | 0.98<br>(-0.86, 2.83)   | -38.04<br>(-409.73, 333.66)    | 223.19<br>(-180.33, 626.72)   |
| PCB 201 | -0.57<br>(-1.87, 0.73) | 1.10<br>(-0.77, 2.96)   | 3.72<br>(-375.03, 382.47)      | 254.14<br>(-155.78, 664.05)   |
| PCB 206 | -0.83<br>(-2.01, 0.35) | 0.95<br>(-0.69, 2.59)   | -55.59<br>(-400.73, 289.55)    | 271.22<br>(-86.20, 628.65)    |

|                                              |                                    |                        |                              |                               |
|----------------------------------------------|------------------------------------|------------------------|------------------------------|-------------------------------|
| PCB 209                                      | -0.74<br>(-1.78, 0.29)             | 0.87<br>(-0.61, 2.36)  | -37.65<br>(-339.94, 264.65)  | 257.88<br>(-63.42, 579.18)    |
| Organochlorine pesticides                    |                                    |                        |                              |                               |
| HCB                                          | <b>1.09</b><br><b>(0.06, 2.11)</b> | -0.10<br>(-1.90, 1.70) | 108.29<br>(-213.01, 429.60)  | -176.09<br>(-564.78, 212.60)  |
| β-HCH                                        | 0.65<br>(-0.02, 1.32)              | -0.23<br>(-6.83, 6.37) | -249.66<br>(-746.53, 247.21) | 457.86<br>(-953.48, 1869.20)  |
| γ-HCH                                        | 0.49<br>(-0.51, 1.49)              | 0.03<br>(-1.82, 1.87)  | 71.00<br>(-220.26, 362.26)   | -10.56<br>(-409.74, 388.61)   |
| Oxychlorthane                                | -1.00<br>(-2.02, 0.02)             | -0.18<br>(-1.93, 1.56) | -226.72<br>(-526.46, 73.01)  | -14.40<br>(-393.22, 364.42)   |
| Trans-nonachlor                              | -0.79<br>(-1.89, 0.32)             | -0.24<br>(-1.79, 1.30) | -212.15<br>(-535.46, 111.16) | 69.57<br>(-267.74, 406.88)    |
| p,p'-DDT                                     | 0.45<br>(-0.22, 1.11)              | 1.38<br>(-3.19, 5.96)  | -327.73<br>(-667.66, 12.19)  | -542.53<br>(-1599.91, 514.84) |
| o,p'-DDT                                     | 0.58<br>(-0.15, 1.32)              | 0.79<br>(-2.08, 3.67)  | -128.97<br>(-492.90, 234.96) | -211.15<br>(-829.09, 406.78)  |
| p,p'-DDE                                     | 0.55<br>(-0.32, 1.41)              | -0.29<br>(-2.22, 1.64) | -62.70<br>(-380.31, 254.92)  | 1.25<br>(-418.29, 420.79)     |
| Mirex                                        | 0.28<br>(-1.47, 2.04)              | 0.33<br>(-2.34, 3.01)  | 326.64<br>(-180.35, 833.62)  | 267.54<br>(-311.15, 846.23)   |
| Perfluoroalkyls and polyfluoroalkyls (PFAAs) |                                    |                        |                              |                               |
| Et-PFOA                                      | -0.64<br>(-1.54, 0.26)             | 0.12<br>(-1.79, 2.04)  | -44.51<br>(-310.19, 221.16)  | 58.73<br>(-358.67, 476.14)    |
| -AcOH                                        | -0.72<br>(-1.69, 0.26)             | 0.11<br>(-1.42, 1.64)  | -144.77<br>(-430.83, 141.29) | -39.56<br>(-375.94, 296.82)   |
| PFDeA                                        | 0.36<br>(-0.64, 1.36)              | -0.33<br>(-1.84, 1.17) | 184.06<br>(-110.50, 478.63)  | -47.11<br>(-376.77, 282.55)   |
| PFNA                                         | 0.62<br>(-0.30, 1.54)              | -1.09<br>(-2.97, 0.80) | 253.07<br>(-12.67, 518.81)   | -180.69<br>(-594.86, 233.47)  |
| PFOSA                                        | 0.39<br>(-0.62, 1.41)              | 0.77<br>(-0.75, 2.28)  | 28.67<br>(-267.40, 324.73)   | 193.06<br>(-136.67, 522.79)   |
| PFOS                                         | 0.72<br>(-0.20, 1.63)              | -0.31<br>(-2.01, 1.39) | 280.29<br>(13.71, 546.86)    | 56.99<br>(-328.36, 442.34)    |
| PFOA                                         | 0.31<br>(-0.60, 1.21)              | -0.22<br>(-1.98, 1.54) | 176.69<br>(-86.09, 439.46)   | -191.81<br>(-575.09, 191.46)  |

AUC: Area under the curve; CI: Confidence interval; GWG: Gestational weight gain; OR: Odds ratio.

<sup>a</sup> Values are beta (95% CI) estimated from multivariable linear regression. Adjusted for pre-pregnancy non-fasting serum lipids.

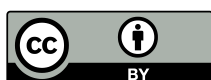

© 2016 by the authors; licensee MDPI, Basel, Switzerland. This article is an open access article distributed under the terms and conditions of the Creative Commons by Attribution (CC-BY) license (<http://creativecommons.org/licenses/by/4.0/>).
